# Supplementary material for: Facile synthesis of CoOx@C/Ti-Fe2O3 photoanodes for efficient photoelectrochemical water oxidation
Source: Royal Society of Chemistry journal article supplement (doi:10.1039/d3dt03391k), 2023-12-05
Supplement: d3dt03391k1.pdf [file d3dt03391k1.pdf]

## Support information

### Facile synthesis of $\text{CoO}_x@\text{C}/\text{Ti-Fe}_2\text{O}_3$ photoanode for efficient photoelectrochemical water oxidation

Hongda Li<sup>a</sup>, Kaikai Ba<sup>a</sup>, Kai Zhang<sup>a</sup>, Yanhong Lin<sup>a</sup>, Wanchun Zhu<sup>a,\*</sup>, and Tengfeng Xie<sup>a,\*</sup>

<sup>a</sup> Institute of Physical Chemistry, College of Chemistry, Jilin University, Changchun 130012, P. R. China

\* Corresponding author: Wanchun Zhu, Tengfeng Xie

E-mail: [wczhu@jlu.edu.cn](mailto:wczhu@jlu.edu.cn); [xietf@jlu.edu.cn](mailto:xietf@jlu.edu.cn)

## Content

Supplementary figures .....3

Fig. S1 to S5

Supplementary table .....7

**Table S1**

## Supplementary figures

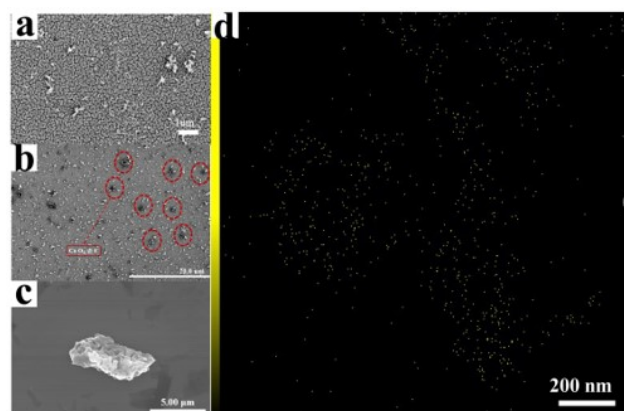

**Fig. S1.** SEM images of (a) Ti-Fe<sub>2</sub>O<sub>3</sub>, (b) CoO<sub>x</sub>@C/Ti-Fe<sub>2</sub>O<sub>3</sub>, (c) CoO<sub>x</sub>@C, (d) EDS elemental mapping of Ti of CoO<sub>x</sub>@C/Ti-Fe<sub>2</sub>O<sub>3</sub>.

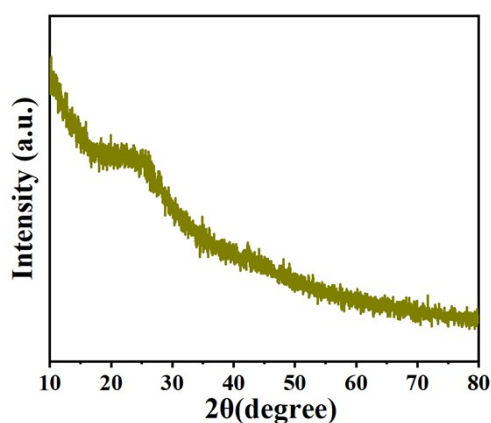

**Fig. S2.** XRD pattern of CoO<sub>x</sub>@C.

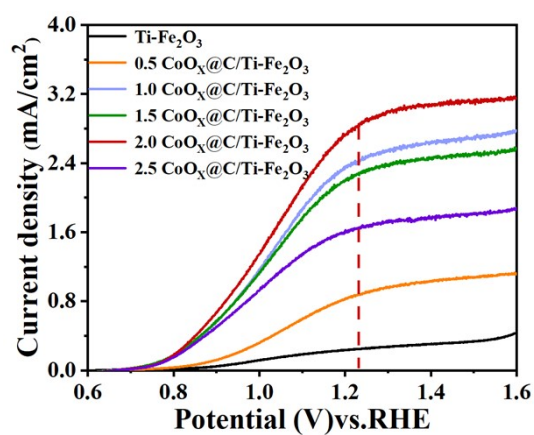

**Fig. S3.** LSV curves of CoO<sub>x</sub>@C/Ti-Fe<sub>2</sub>O<sub>3</sub> photoanodes with different cobalt-contents.

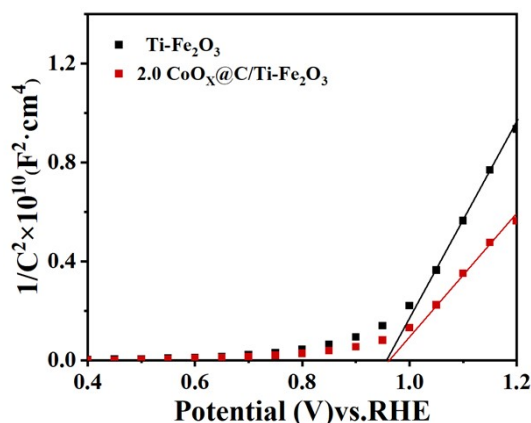

**Fig. S4.** Mott-Schottky curves for the Ti-Fe<sub>2</sub>O<sub>3</sub> and CoO<sub>x</sub>@C/Ti-Fe<sub>2</sub>O<sub>3</sub> photoanodes.

The Mott-Schottky plots of Ti-Fe<sub>2</sub>O<sub>3</sub> and 2.0 CoO<sub>x</sub>@C/Ti-Fe<sub>2</sub>O<sub>3</sub> were shown in Fig. S4. The slope in Fig. S4 can be used to calculate the carrier density, and it can be seen that the carrier concentration of 2.0 CoO<sub>x</sub>@C/Ti-Fe<sub>2</sub>O<sub>3</sub> was significantly better than that of Ti-Fe<sub>2</sub>O<sub>3</sub>. The increasing in carrier density mainly came from the high conductivity of CoO<sub>x</sub>@C, which thus allowed for a better transfer of charge and facilitated the efficiency of the separation of photogenerated carriers. And the slopes of the Mott Schottky diagram curves of the photoanodes were all positive, indicating that these photoanodes had the nature of n-type semiconductors.

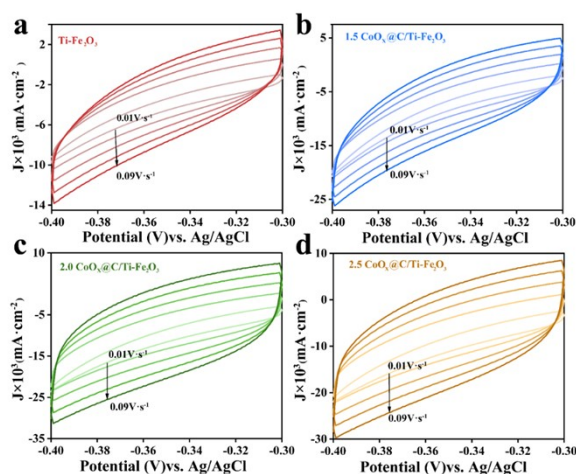

**Fig. S5.** CV curves of all photoanodes for the Ti-Fe<sub>2</sub>O<sub>3</sub> and CoO<sub>x</sub>@C/Ti-Fe<sub>2</sub>O<sub>3</sub> photoanodes.

As can be seen in Fig. S5, the ECSA of the Ti-Fe<sub>2</sub>O<sub>3</sub> and CoO<sub>x</sub>@C/Ti-Fe<sub>2</sub>O<sub>3</sub> electrodes the area of the CV curve increased gradually with the scan rate (0.01 ~ 0.09 V s<sup>-1</sup>), and CoO<sub>x</sub>@C/Ti-Fe<sub>2</sub>O<sub>3</sub> can obtain a higher capacitance than Ti-Fe<sub>2</sub>O<sub>3</sub>. The large capacitance meant that CoO<sub>x</sub>@C can capture more photogenerated carriers from Ti-Fe<sub>2</sub>O<sub>3</sub>.

## Supplementary table

Table S1. Comparison of the photocurrent density of Ti-Fe<sub>2</sub>O<sub>3</sub> and CoO<sub>x</sub>@C/Ti-Fe<sub>2</sub>O<sub>3</sub> under AM 1.5 G illumination

| Table S1. EIS fitting results of Ti-Fe <sub>2</sub> O <sub>3</sub> , 1.5 Co@C/Ti-Fe <sub>2</sub> O <sub>3</sub> , 2.0 Co@C/Ti-Fe <sub>2</sub> O <sub>3</sub> and 2.5 Co@C/Ti-Fe <sub>2</sub> O <sub>3</sub> photoanodes |                    |                       |                           |                     |                           |
|-------------------------------------------------------------------------------------------------------------------------------------------------------------------------------------------------------------------------|--------------------|-----------------------|---------------------------|---------------------|---------------------------|
| Photoanode                                                                                                                                                                                                              | R <sub>S</sub> (Ω) | R <sub>bulk</sub> (Ω) | CPE1(F·cm <sup>-2</sup> ) | R <sub>ct</sub> (Ω) | CPE2(F·cm <sup>-2</sup> ) |
| Ti-Fe <sub>2</sub> O <sub>3</sub>                                                                                                                                                                                       | 68.71              | 402.1                 | 9.6476×10 <sup>-6</sup>   | 2068                | 0.83469                   |
| 1.5 Co@C/Ti-Fe <sub>2</sub> O <sub>3</sub>                                                                                                                                                                              | 63.35              | 211.5                 | 2.919×10 <sup>-5</sup>    | 696.3               | 0.87179                   |
| 2.0 Co@C/Ti-Fe <sub>2</sub> O <sub>3</sub>                                                                                                                                                                              | 81.85              | 163.5                 | 1.6924×10 <sup>-5</sup>   | 251.7               | 0.85296                   |
| 2.5 Co@C/Ti-Fe <sub>2</sub> O <sub>3</sub>                                                                                                                                                                              | 102.2              | 714.9                 | 3.5921×10 <sup>-5</sup>   | 822.7               | 0.7006                    |
